# Supplementary material for: In Vitro Hepatotoxicity of Routinely Used Opioids and Sedative Drugs
Source: MDPI journal article supplement (doi:10.3390/cimb46040189), 2024-03-30
Supplement: s1 [file s1]

| Test parameter                                     | 0.9 % DMSO       | Negative Control |
|----------------------------------------------------|------------------|------------------|
| Cell Count<br>(x 1.000)<br>n=3                     | 730 (605 - 1020) | 555 (435 – 610)  |
| Vitality [%]<br>n=3                                | 80 (80 – 89)     | 84 (79 – 89)     |
| LDH [U/l]<br>n=5                                   | 71 (44 – 81)     | 25 (21 – 30)     |
| XTT (OD)<br>n=15                                   | 1.8 (1.8 – 2.8)  | 1.3 (1.2 – 1.5)  |
| CYP1A2-<br>activity:<br>resorufin<br>[pmol/l], n=8 | 3.7 (2.9 – 4.8)  | 5.5 (2.6 – 5.7)  |

**Supplementary Table S1:** Test results for HepG2/C3A cells after exposure to 0.9 % DMSO (dimethyl sulfoxide) compared with pure cell culture medium after 3 days incubation. Values represent as median and min/max. LDH: lactate dehydrogenase

|                                                           | pH                  |                     |                       |
|-----------------------------------------------------------|---------------------|---------------------|-----------------------|
|                                                           | C <sub>max</sub>    | C <sub>5x</sub>     | C <sub>10x</sub>      |
| <b>Midazolam</b><br>(300 ng/ml   1500 ng/ml   3000 ng/ml) | 7,71<br>7,71 / 7,75 | 7,71<br>7,69 / 7,73 | 7,82<br>7,78 / 7,82   |
| <b>Propofol</b><br>(2 µg/ml   10 µg/ml   20 µg/ml)        | 7,69<br>7,69 / 7,71 | 7,73<br>7,73 / 7,75 | 7,69<br>7,67 / 7,69   |
| <b>S-Ketamine</b><br>(1 µg/ml   5 µg/ml   10 µg/ml)       | 7,70<br>7,70 / 7,71 | 7,79<br>7,78 / 7,80 | 7,81<br>7,80 / 7,82   |
| <b>Thiopental</b><br>(1 mg/ml   5 mg/ml   10 mg/ml)       | 7,75<br>7,75 / 7,77 | 7,79<br>7,79 / 7,83 | 8,01 *<br>7,92 / 8,01 |
| <b>Fentanyl</b><br>(10 ng/ml   50 ng/ml   100 ng/ml)      | 7,74<br>7,72 / 7,76 | 7,68<br>7,66 / 7,70 | 7,68<br>7,68 / 7,68   |
| <b>Remifentanyl</b><br>(15 ng/ml   75 ng/ml   150 ng/ml)  | 7,66<br>7,65 / 7,66 | 7,62<br>7,60 / 7,65 | 7,62<br>7,62 /        |
| <b>Sufentanyl</b><br>(1 ng/ml   5 ng/ml   10 ng/ml)       | 7,66<br>7,65 / 7,68 | 7,75<br>7,73 / 7,78 | 7,71<br>7,70 / 7,72   |
| <b>Negative control</b>                                   | 7,75<br>7,71 / 7,85 |                     |                       |

**Supplementary Table S2:** pH for HepG2/C3A cells in medium after exposure to sedatives and opioids in concentrations C<sub>max</sub>, C<sub>5x</sub> and C<sub>10x</sub>. Values represent as median and 25th/75th percentile. Significance between negative control and exposure groups is indicated by \* p < 0.05.

|                                                           | pH                    |                       |                       |
|-----------------------------------------------------------|-----------------------|-----------------------|-----------------------|
|                                                           | C <sub>max</sub>      | C <sub>5x</sub>       | C <sub>10x</sub>      |
| <b>Midazolam</b><br>(300 ng/ml   1500 ng/ml   3000 ng/ml) | 7,63<br>7,61 / 7,65   | 7,88 *<br>7,79 / 7,89 | 7,74<br>7,71 / 7,74   |
| <b>Propofol</b><br>(2 µg/ml   10 µg/ml   20 µg/ml)        | 7,64<br>7,63 / 7,65   | 7,68<br>7,67 / 7,69   | 7,68<br>7,64 / 7,68   |
| <b>S-Ketamine</b><br>(1 µg/ml   5 µg/ml   10 µg/ml)       | 7,64<br>7,64 / 7,65   | 7,74 *<br>7,72 / 7,74 | 7,73 *<br>7,71 / 7,74 |
| <b>Thiopental</b><br>(1 mg/ml   5 mg/ml   10 mg/ml)       | 7,71 *<br>7,70 / 7,71 | 7,95 *<br>7,84 / 7,97 | 7,76 *<br>7,74 / 7,77 |
| <b>Fentanyl</b><br>(10 ng/ml   50 ng/ml   100 ng/ml)      | 7,67<br>7,66 / 7,67   | 7,65<br>7,64 / 7,65   | 7,64<br>7,63 / 7,68   |
| <b>Remifentanil</b><br>(15 ng/ml   75 ng/ml   150 ng/ml)  | 7,58<br>7,58 / 7,59   | 7,64<br>7,61 / 7,76   | 7,58<br>7,56 / 7,58   |
| <b>Sufentanil</b><br>(1 ng/ml   5 ng/ml   10 ng/ml)       | 7,63<br>7,60 / 7,64   | 7,64<br>7,63 / 7,64   | 7,63<br>7,60 / 7,67   |
| <b>Negativkontrolle</b>                                   | 7,66<br>7,60 / 7,69   |                       |                       |

**Supplementary Table S3:** pH for HepG2/C3A cells in plasma after exposure to sedatives and opioids in concentrations C<sub>max</sub>, C<sub>5x</sub> and C<sub>10x</sub>. Values represent as median and 25th/75th percentile.

Significance between negative control and exposure groups is indicated by \* p < 0.05
